1 Engagement with COVID-19 Public Health Measures in the United  
2 States: A Cross-Sectional Social Media Analysis from June to  
3 November 2020

4  
5 **Original Paper**

6  
7 Daisy Massey, BA;<sup>1</sup> Chenxi Huang, PhD;<sup>1</sup> Yuan Lu, ScD;<sup>1,2</sup> Alina Cohen, MS, MBA;<sup>3</sup> Yahel  
8 Oren, MS;<sup>3</sup> Tali Moed, BS;<sup>3</sup> Pini Matzner, PhD;<sup>3</sup> Shiwani Mahajan, MBBS, MHS;<sup>1,2</sup> César  
9 Caraballo, MD;<sup>1,2</sup> Navin Kumar, MPhil;<sup>4</sup> Yuchen Xue, MA;<sup>5</sup> Qinglan Ding, PhD, MBBS;<sup>6</sup>  
10 Rachel P. Dreyer, PhD;<sup>7</sup> Brita Roy, MD, MPH, MHS;<sup>8,9</sup> Harlan M. Krumholz, MD, SM<sup>1,2,10</sup>

11  
12 <sup>1</sup> Center for Outcomes Research and Evaluation, Yale New Haven Hospital, New Haven,  
13 Connecticut

14 <sup>2</sup> Section of Cardiovascular Medicine, Department of Internal Medicine, Yale School of  
15 Medicine, New Haven, Connecticut

16 <sup>3</sup> Signals Analytics, New York, New York and Netanya, Israel

17 <sup>4</sup> Department of Sociology, Yale University, New Haven, Connecticut

18 <sup>5</sup> Foundation for a Smoke-Free World, New York, New York

19 <sup>6</sup> College of Health and Human Sciences, Purdue University, West Lafayette, Indiana

20 <sup>7</sup> Department of Emergency Medicine, Yale School of Medicine, New Haven, Connecticut

21 <sup>8</sup> Department of Medicine, Yale School of Medicine, New Haven, Connecticut

22 <sup>9</sup> Department of Chronic Disease Epidemiology, Yale School of Public Health, New Haven,  
23 Connecticut

24 <sup>10</sup> Department of Health Policy and Management, Yale School of Public Health, New Haven,  
25 Connecticut

26

27 **Address correspondence to:**

28 Harlan M. Krumholz MD, SM

29 1 Church Street, Suite 200, New Haven, CT 06510

30 Telephone: 203-764-5885; Fax: 203-764-5653

31 Email: [harlan.krumholz@yale.edu](mailto:harlan.krumholz@yale.edu); Twitter: @hmkyale

32

33

34 **Abstract**

35 **Background:** The coronavirus disease 2019 (COVID-19) has continued to spread in the US and  
36 globally. Closely monitoring public engagement and perception of COVID-19 and preventive  
37 measures using social media data could provide important information for understanding the  
38 progress of current interventions and planning future programs.

39 **Objective:** To measure the public's behaviors and perceptions regarding COVID-19 and its daily  
40 life effects during the recent 5 months of the pandemic.

41 **Methods:** Natural language processing (NLP) algorithms were used to identify COVID-19  
42 related and unrelated topics in over 300 million online data sources from June 15 to November  
43 15, 2020. Posts in the sample were geotagged, and sensitivity and specificity were both  
44 calculated to validate the classification of posts. The prevalence of discussion regarding these  
45 topics was measured over this time period and compared to daily case rates in the US.

46 **Results:** The final sample size included 9,065,733 posts, 70% of which were sourced from the  
47 US. In October and November, discussion including mentions of COVID-19 and related health  
48 behaviors did not increase as it had from June to September, despite an increase in COVID-19  
49 daily cases in the US beginning in October. Additionally, counter to reports from March and  
50 April, discussion was more focused on daily life topics (69%), compared with COVID-19 in  
51 general (37%) and COVID-19 public health measures (20%).

52 **Conclusions:** There was a decline in COVID-19-related social media discussion sourced mainly  
53 from the US, even as COVID-19 cases in the US have increased to the highest rate since the  
54 beginning of the pandemic. Targeted public health messaging may be needed to ensure  
55 engagement in public health prevention measures until a vaccine is widely available to the  
56 public.

57  
58 **Keywords:** COVID-19 public perception; COVID-19 social media; infodemic; social media  
59 research; social media analysis; natural language processing; Reddit data; Facebook data;  
60 COVID-19 public health measures; public health surveillance

61

## 62 **Introduction**

63 As the coronavirus disease 2019 (COVID-19) continues its spread in the United States (US),  
64 a key to controlling the spread until a vaccine is widely available is to enlist the public in risk-  
65 mitigation behaviors.[1,2] Studying the public's social media posts regarding COVID-19 public  
66 health measures may provide information about targets of intervention, progress toward behavior  
67 goals, and risk of future outbreaks.[3-9] Although real-time reports on pandemic-related tests and  
68 mortality are widely available, there are fewer opportunities to gain near real-time insight into  
69 behaviors and beliefs about the pandemic.

70 Social media, which people are using now more than ever to communicate, has served as a  
71 useful data source in providing rapid insight into the public's behaviors and beliefs during the  
72 pandemic.[10-13] Studies have noted a high prevalence of COVID-19-related discussion,  
73 including such topics as hygiene, shortages, and the spread of misinformation, and an increase in  
74 COVID-19-related discussion as COVID-19 cases increase.[5,14,15] However, existing findings  
75 are based on evidence during only the beginning of the outbreak, from December 2019 to April  
76 2020, and the range of topics and keywords explored is also limited.[7,14,15-19] Additionally,  
77 studies analyzing COVID-19 behaviors and beliefs on social media have primarily used Twitter  
78 as their source, which has several limitations.[14-16] Most notably, highly rated retweets are  
79 more likely to derive from spam and bot accounts, which are also actively posting about COVID-  
80 19, and can obscure the targeting of signals from human discussions.[20-22] Further, previous  
81 studies each focused on a particular aspect of the pandemic, such as disinformation relating to  
82 the pandemic, without comparing the volume of discussion related to multiple aspects to  
83 determine the public's relative focus on particular pandemic-related issues and behaviors.

84 Therefore, there is a need to assess how the public’s current reaction to the pandemic has  
85 changed since the early stages, by examining broad online discussion from more diverse sources.

86 Accordingly, we studied changes in social media discussion of multiple topics, including  
87 daily life topics, which may be affected by the pandemic, COVID-19-related public health  
88 behavior topics, and mentions of COVID-19, from June through November 2020, and assessed  
89 their correlation with COVID-19 new daily case rates (incidence). In measuring these trends in  
90 social media data and the COVID-19 incidence rate in the US, we sought to elucidate the US  
91 public’s engagement with COVID-19-related public health measures, which are crucial to  
92 addressing the current pandemic.

## 93 **Methods**

### 94 **Data Sources**

95 The data sample consisted of unstructured, English-language posts from social media outlets  
96 and forums, such as Reddit, Facebook, and 4Chan and comments from news sites.[23] Signals  
97 Analytics, an advanced analytics consultant that conducted the analysis, accessed these data  
98 sources through a third-party data vendor, NetBase.[24,25] These social media posts were  
99 geotagged by NetBase both directly, by using geolocation data from posts, and indirectly, by  
100 using author profiles and unique domain codes (such as .uk). All data were deidentified by  
101 NetBase before being transferred to Signals Analytics.

102 In addition to the social data, the study included US COVID-19 case data from the COVID-  
103 19 Dashboard by the Center for Systems Science and Engineering at Johns Hopkins  
104 University.[26] These data were updated daily using a public application programming interface  
105 (API), and included total number of deaths, new daily deaths, total active cases, and daily new  
106 cases.[27]

107 No personal identifying information (eg, usernames, emails, or IP addresses) was shared as  
108 part of the analysis or reporting process. This study was exempted from Institutional Review  
109 Board review by Yale University as it did not engage in research involving human subjects.

## 110 **Approach**

111 To determine trends in social media discussion during the COVID-19 pandemic, we  
112 collected data posts from all Internet sources and applied natural language processing (NLP)  
113 algorithms to identify and classify mentions of COVID-19, COVID-19-related public health  
114 measures, and daily life topics.

115 NetBase runs a daily query that we designed based on our project scope on over 300 million  
116 online data sources from June 15 to November 15, 2020 (eMethods 1). There were several steps  
117 to narrow the sample retrieved from the query to include only posts relevant to our research  
118 question (eTable 1). First, NLP algorithms were run to remove advertisements and pornography-  
119 related sites and posts (eMethods 2). Next, a taxonomy of topics was applied (eMethods 3). The  
120 posts that did not include discussion of topics from the taxonomy were deleted. Finally, all news  
121 articles and blog posts were deleted from the sample, so that the only remaining data posts were  
122 from social outlets (forums and comments on news sites).

123 The taxonomy was comprised of two categories, COVID-19-related public health measures  
124 and daily life behaviors, each of which included multiple topics (eMethods 4). COVID-19  
125 mentions was also an individual topic in the taxonomy, independent of either category, to  
126 measure posts that directly mentioned COVID-19 by name or synonym.

127 Once all posts were classified according to the topics in the taxonomy, we measured trends in  
128 these topics over time by tracking the total number of posts that included mentions of each  
129 taxonomy topic and category. Classifications of topics and categories were not mutually

130 exclusive, so the same post was able to be classified by multiple topics across any category.

131 Trends were visualized by taxonomy category, COVID-19 mentions, and by the most commonly  
132 mentioned taxonomy topics. These trends were visualized with the COVID-19 incidence rate in  
133 the US.

134 This approach allowed us to identify changes in both topics that prior research in the  
135 early stage of the outbreak had shown to be prevalent in COVID-19 discussion, and in topics  
136 from daily life and COVID-19 literature reviews that were not previously known to be found in  
137 COVID-19 discussion, but may have become so or changed significantly as COVID-19 cases or  
138 current events changed.[15,16,28-32] Additionally, our approach removed redundant posts,  
139 limiting the effect of bots and reposts. The taxonomy classification was validated by calculating  
140 specificity and sensitivity (eMethods 5). In an independent data sample of 100 posts classified by  
141 manual review, the algorithm had over 80% specificity, which is higher than comparable social  
142 media research.[29] Sensitivity was calculated as the number of correct classifications of a topic  
143 using the NLP algorithms divided by the total number of posts for the topic identified by manual  
144 screening, and we found that our taxonomy approach led to an average classification rate of 92%  
145 sensitivity. We also validated the methodology by applying it to US-specific current events and  
146 found that the approach revealed an increase in online social discussion when the given current  
147 event topic was most relevant (eFigure 1). This methodology has been shown to reveal insights  
148 into outbreak characterization and event prediction for the E-cigarette or Vaping Use-Associated  
149 Lung Injury (EVALI) outbreak.[33]

## 150 **Results**

151 The final data sample consisted of 9,065,733 online social posts that mentioned at least  
152 one of the topics in our taxonomy from June 15 to November 15, 2020 (Table 1). The majority

153 (87%) of posts in our sample came from sources that were categorized as forums, such as Reddit  
 154 and Facebook (Table 2; eTable 1).[23] The minority of posts (13%) in our sample were derived  
 155 from comment sections on news sites, including The Hill, a media source focused on politics and  
 156 business, and Breitbart, a right-leaning media source (Table 2; eTable 1).[34,35] Most posts in  
 157 the sample were not able to be directly geotagged due to sources' data privacy measures and  
 158 restrictions. A minority were geotagged as from the US, with the remaining geotagged as from a  
 159 country other than the US (eTable 2). Using indirect geotagging provided by NetBase, it was  
 160 estimated that about 70% of all initial posts collected by the search query were from the US.

161 Table 1. Number of posts by taxonomy topic (June 15 to November 15, 2020)

| Relevant Taxonomy Categories<br>(Percent Classified within All<br>Posts)<br>N=9,065,733 | Relevant Taxonomy<br>Topics | Number of Posts with Mentions<br>(Percent Classified within<br>Category) |
|-----------------------------------------------------------------------------------------|-----------------------------|--------------------------------------------------------------------------|
| <b>COVID-19-Related Public<br/>Health Topics<br/>(20)</b>                               |                             | <b>1,836,200</b>                                                         |
|                                                                                         | Wearing Face-Mask           | 1,120,344 (61)                                                           |
|                                                                                         | Lockdown                    | 457,705 (25)                                                             |
|                                                                                         | Social Distancing           | 242,105 (13)                                                             |
|                                                                                         | Quarantine                  | 94,301 (5)                                                               |
|                                                                                         | Testing                     | 87,712 (5)                                                               |
|                                                                                         | Excessive Hand-Wash         | 64,679 (4)                                                               |
|                                                                                         | Contact Tracing             | 31,775 (2)                                                               |
|                                                                                         | Reopening                   | 16,681 (1)                                                               |
|                                                                                         | Screening                   | 14,569 (1)                                                               |
|                                                                                         | Wearing Gloves              | 11,531 (1)                                                               |
|                                                                                         | Disinfection                | 11,076 (1)                                                               |
|                                                                                         | Wearing Face Shield         | 10,104 (1)                                                               |
| <b>Daily Life Taxonomy Topics<br/>(69)</b>                                              |                             | <b>6,210,255</b>                                                         |
|                                                                                         | Sex Life                    | 887,457 (14)                                                             |
|                                                                                         | Food                        | 838,513 (14)                                                             |
|                                                                                         | Financial                   | 710,757 (11)                                                             |
|                                                                                         | Travel                      | 651,426 (10)                                                             |



|                                     |                  |
|-------------------------------------|------------------|
| Smoking/Vaping                      | 476,468 (8)      |
| Mass Gatherings                     | 451,815 (7)      |
| Virtual Communication               | 414,549 (7)      |
| Alcohol Consumption                 | 398,229 (6)      |
| Religion                            | 285,538 (5)      |
| New Skills/Hobbies Acquisition/ DIY | 280,155 (5)      |
| Drug Use                            | 257,819 (4)      |
| News/Media Consumption              | 257,415 (4)      |
| Reading                             | 246,074 (4)      |
| Physical Activity                   | 205,116 (3)      |
| Work from Home                      | 198,057 (3)      |
| Socializing in Person               | 177,522 (3)      |
| Stockpiling                         | 171,421 (3)      |
| Relaxation Techniques               | 164,262 (3)      |
| Excess Sleep                        | 127,623 (2)      |
| Pets                                | 109,510 (2)      |
| Postponing Plans                    | 98,626 (2)       |
| Childcare                           | 97,735 (2)       |
| Public Transportation               | 94,414 (2)       |
| Reduced Sleep Quality               | 88,196 (1)       |
| Home School                         | 80,153 (1)       |
| Non-COVID Hospital Visits           | 77,278 (1)       |
| Doctor Well Visit                   | 72,235 (1)       |
| Funerals                            | 45,394 (1)       |
| Family-Centered Time                | 28,106 (0)       |
| Outdoor Culture                     | 21,546 (0)       |
| Births                              | 17,283 (0)       |
| Telehealth                          | 11,574 (0)       |
| Smokeless Tobacco Consumption       | 2,136 (0)        |
| <b>COVID-19 Mentions (37)</b>       | <b>3,390,139</b> |

162 Table 2. Number of posts by source type (June 15 to November 15)

|                                       |                                                                |                                                   |                                                          |                                   |
|---------------------------------------|----------------------------------------------------------------|---------------------------------------------------|----------------------------------------------------------|-----------------------------------|
| Category of COVID-19 Discussion Topic | Posts with Mentions of COVID-19 Related Public Health Behavior | Posts with Mentions of Daily Life (%) N=6,210,255 | Posts with Mentions of COVID-19 Mentions (%) N=3,390,139 | Total Data Sample (%) N=9,065,733 |
|---------------------------------------|----------------------------------------------------------------|---------------------------------------------------|----------------------------------------------------------|-----------------------------------|

|                 | (%)<br>N=1,836,200 |                |                |                |
|-----------------|--------------------|----------------|----------------|----------------|
| <b>Forums</b>   | 1,494,401 (81)     | 5,714,446 (92) | 2,749,451 (81) | 7,928,599 (87) |
| <b>Comments</b> | 341,799 (19)       | 495,809 (8)    | 640,688 (19)   | 1,137,134 (13) |

163

164           Within the data sample, 6,210,255 (69%) posts were classified as belonging to the  
165 category of daily life topics, 3,390,139 (37%) contained mentions of COVID-19, and 1,836,200  
166 (20%) posts were classified as belonging to the category of COVID-19-related public health  
167 topics (Table 1). The most prevalent topics among the daily life posts were Sex Life (887,457  
168 [14%]), Food (838,513 [14%]), and Financial Concerns (710,757 [11%]). The most prevalent  
169 topic in COVID-19-related public health behaviors posts was Wearing Face Masks (1,120,344  
170 [61%]), followed by Lockdown (457,705 [25%]), and Social Distancing (242,105 [13%]).

171           Online social posts including COVID-19 mentions and COVID-19-related public health  
172 behaviors increased in June, as COVID-19 cases also increased, but remained stagnant as cases  
173 began to increase in October (Figure 1). Discussion about wearing face masks was most  
174 prevalent in mid-July, during the summer wave (mid-June to early September) of COVID-19  
175 cases and has remained at pre-June levels in October and November, with the exception of a  
176 sharp increase on October 2, 2020 (Figure 2).

## 177 **Discussion**

178           From June to November 2020, predominantly US-based online social chatter was more  
179 focused on daily life than it was on public health behaviors relating to COVID-19. Although  
180 discussion relating to COVID-19 and related public health behaviors appeared to increase with  
181 rising US cases in the summer wave (early June to early September), the volume of COVID-19-  
182 related discussion was lower in the ongoing wave that began in the fall (mid-October), despite  
183 the fact that during the fall wave, COVID-19 cases increased to their highest rates since the

184 pandemic began.[36] In particular, discussion of wearing facemasks, the most prevalent of any  
185 COVID-19 public health behavior we studied, declined in mid-July despite the pandemic  
186 continuing and evidence that wearing facemasks has not been universally adopted in the US, and  
187 increased only minimally once cases began to increase again in early October.[37,38] One  
188 exception was the brief but stark increase in COVID-19-related discussion on October 2, 2020,  
189 which coincided with the announcement that President Donald Trump had contracted COVID-  
190 19.[39] The high prevalence of daily life topics in social media chatter compared with COVID-  
191 19-related public health behaviors and mentions of COVID-19 is not immediately surprising  
192 given the differences in scope; however, the decrease of COVID-19 related discussion in the  
193 context of rising COVID-19 cases differs from the pattern we visualized in the summer wave and  
194 from patterns reported during the spring (March to June) wave.

195 Our findings differed from those of previous COVID-19-related social media analyses  
196 using Twitter and conducted earlier in the pandemic. Reports from March that used data from  
197 Twitter indicated that social media discussion about COVID-19-related health discussion was  
198 high, and more common than discussion about daily life topics such as socializing, the economy,  
199 or politics.[40] Earlier research also found that COVID-19-related public health measures were  
200 discussed more often than social topics and more often than other COVID-19-related  
201 topics.[15,7] Although this difference may be due to different sources and time periods, a change  
202 might have occurred in the public's focus on COVID-19 preventative behaviors. For instance, as  
203 public health experts have warned against relaxing preventive behaviors as pandemic fatigue  
204 builds, activity and traffic data have indicated that people may have stopped adhering to public  
205 health recommendations to stay home and avoid close contact.[41-44] The decline of chatter  
206 regarding wearing facemasks, and the relative low rates of discussions on other COVID-19-

207 related public health behaviors may reflect that social media engagement with these issues has  
208 decreased as the pandemic has progressed, and remains low among the US population as the  
209 pandemic continues to confront a high COVID-19 daily case rate.

210 Our study has several limitations. First, although our third-party data provider reported  
211 that about 70% of posts were from the US, we do not know the location for most posts according  
212 to our direct geotagging methods, which were only able to tag about 80% of posts (eTable 2). As  
213 a result, we cannot make international comparisons, but our dataset is more representative of the  
214 US than of any other country. Second, the number of posts included in our dataset was much  
215 lower than previous studies, likely due to the types of data sources used, which excluded sites  
216 such as Twitter in order to exclude noise that might have obscured signals in social media data,  
217 and our methodology, which included removing posts not relevant to our more refined  
218 taxonomy. We used a stringent exclusion criterion with a list of prespecified keywords that may  
219 also have led to a smaller sample size, but our approach aimed to create a sample with high  
220 specificity. Finally, there is no demographic information available from the data posts directly  
221 due to privacy considerations and data use agreements. Thus, we cannot determine whether our  
222 data sample contains biases due to the demographics of the people who post. For instance,  
223 Reddit, which was the most common forum source for our data sample, has been found to be  
224 used by a younger, male audience.[45,46]

## 225 **Conclusion**

226 In this study of predominantly US-based COVID-19 social media data from June to  
227 November 2020, we observed that COVID-19 and relevant public health measures were  
228 discussed less than daily life behaviors on social media, and that discussion on wearing  
229 facemasks decreased throughout the summer and into the fall, while cases increased. These

230 discussion rates may reveal a need for increased public health messaging as the pandemic  
231 continues.

## 232 **Acknowledgments**

233 Alina Cohen, Tali Moed, Pini Matzner, and Yahel Oren from Signals Analytics had full access to  
234 the data in the study and take responsibility for the integrity of the data and the accuracy of the  
235 data analysis. Daisy Massey from Yale School of Medicine takes full responsibility for the data  
236 interpretation and writing. This work was supported by the project *Insights about the COVID*  
237 *Pandemic Using Public Data* IRES PD: 20-005872 with funding from the Foundation for a  
238 Smoke-Free World.

## 239 **Conflicts of Interest**

240 Yuan Lu is supported by the National Heart, Lung, and Blood Institute (K12HL138037) and the  
241 Yale Center for Implementation Science. Rachel Dreyer is supported by an American Heart  
242 Association Transformational Project Award (#19TPA34830013) and a Canadian Institutes of  
243 Health Research Project Grant (RN356054–401229). In the past three years, Harlan Krumholz  
244 received expenses and/or personal fees from UnitedHealth, IBM Watson Health, Element  
245 Science, Aetna, Facebook, the Siegfried and Jensen Law Firm, Arnold and Porter Law Firm,  
246 Martin/Baughman Law Firm, F-Prime, and the National Center for Cardiovascular Diseases in  
247 Beijing. He is an owner of Refactor Health and HugoHealth, and had grants and/or contracts  
248 from the Centers for Medicare & Medicaid Services, Medtronic, the U.S. Food and Drug  
249 Administration, Johnson & Johnson, and the Shenzhen Center for Health Information. The  
250 remaining authors have no disclosures to report.

251 **Abbreviations**

252 COVID-19: coronavirus disease 2019

253 US: United States

254 API: application programming interface

255 NLP: natural language processing

256 EVALI: e-cigarette or vaping use-associated lung injury

## References

1. Anderson RM, Heesterbeek H, Klinkenberg D, Hollingsworth TD. How will country-based mitigation measures influence the course of the COVID-19 epidemic? *The Lancet*. 2020;395(10228):931-4. PMID:32164834. doi: 10.1016/S0140-6736(20)30567-5.
2. Pan A, Liu L, Wang C, Guo H, Hao X, Wang Q, et al. Association of Public Health Interventions With the Epidemiology of the COVID-19 Outbreak in Wuhan, China. *JAMA*. 2020;323(19):1915-23. PMID: 32275295. doi: 10.1001/jama.2020.6130.
3. Signorini A, Segre AM, Polgreen PM. The use of Twitter to track levels of disease activity and public concern in the U.S. during the influenza A H1N1 pandemic. *PLoS One*. 2011 May 4;6(5):e19467. PMID: 21573238. doi: 10.1371/journal.pone.0019467.
4. Husnayain A, Shim E, Fuad A, Su EC-Y. Assessing the community risk perception toward COVID-19 outbreak in South Korea: evidence from Google and NAVER relative search volume. *medRxiv*. 2020:2020.04.23.20077552. doi: 10.1101/2020.04.23.20077552.
5. Lin Y-H, Liu C-H, Chiu Y-C. Google searches for the keywords of “wash hands” predict the speed of national spread of COVID-19 outbreak among 21 countries. *Brain, Behavior, and Immunity*. 2020 2020/04/10/. PMID: 32283286. doi: <https://doi.org/10.1016/j.bbi.2020.04.020>.
6. Puri N, Coomes EA, Haghbayan H, Gunaratne K. Social media and vaccine hesitancy: new updates for the era of COVID-19 and globalized infectious diseases. *Hum Vaccin Immunother*. 2020 Jul 21:1-8. PMID: 32693678. doi: 10.1080/21645515.2020.1780846.
7. Wang X, Zou C, Xie Z, Li D. Public Opinions towards COVID-19 in California and New York on Twitter. *medRxiv*. 2020 Jul 14. PMID: 32699856. doi: 10.1101/2020.07.12.20151936.
8. Bavel JJV, Baicker K, Boggio PS, Capraro V, Cichocka A, Cikara M, et al. Using social and behavioural science to support COVID-19 pandemic response. *Nature Human Behaviour*. 2020 2020/05/01;4(5):460-71. PMID: 32355299. doi: 10.1038/s41562-020-0884-z.

9. Malecki K, Keating JA, Safdar N. Crisis Communication and Public Perception of COVID-19 Risk in the Era of Social Media. *Clin Infect Dis*. 2020 Jun 16. PMID: 32544242. doi: 10.1093/cid/ciaa758.
10. Ella Koeze NP. The Virus Changed the Way We Internet. *The New York Times*. 2020 April 7, 2020. <https://www.nytimes.com/interactive/2020/04/07/technology/coronavirus-internet-use.html>
11. Fagherazzi G, Goetzinger C, Rashid MA, Aguayo GA, Huiart L. Digital Health Strategies to Fight COVID-19 Worldwide: Challenges, Recommendations, and a Call for Papers. *J Med Internet Res*. 2020 Jun 16;22(6):e19284. PMID: 32501804. doi: 10.2196/19284.
12. Li S, Feng B, Liao W, Pan W. Internet Use, Risk Awareness, and Demographic Characteristics Associated With Engagement in Preventive Behaviors and Testing: Cross-Sectional Survey on COVID-19 in the United States. *J Med Internet Res*. 2020 Jun 16;22(6):e19782. PMID: 32501801. doi: 10.2196/19782.
13. Brady WJ, Crockett MJ, Van Bavel JJ. The MAD Model of Moral Contagion: The Role of Motivation, Attention, and Design in the Spread of Moralized Content Online. *Perspectives on Psychological Science*. 2020 2020/07/01;15(4):978-1010. PMID: 32511060. doi: 10.1177/1745691620917336.
14. Lwin MO, Lu J, Sheldenkar A, Schulz PJ, Shin W, Gupta R, et al. Global Sentiments Surrounding the COVID-19 Pandemic on Twitter: Analysis of Twitter Trends. *JMIR Public Health Surveill*. 2020 May 22;6(2):e19447. PMID: 32412418. doi: 10.2196/19447.
15. Singh L, Bansal S, Bode L, Budak C, Chi G, Kawintiranon K, et al. A first look at COVID-19 information and misinformation sharing on Twitter. *arXiv preprint arXiv:200313907*. 2020. PMID: 32287039
16. Abd-Alrazaq A, Alhuwail D, Househ M, Hamdi M, Shah Z. Top Concerns of Tweeters During the COVID-19 Pandemic: Inveillance Study. *J Med Internet Res*. 2020 Apr 21;22(4):e19016. PMID: 32287039. doi: 10.2196/19016.



17. Massaad E, Cherfan P. Social Media Data Analytics on Telehealth During the COVID-19 Pandemic. *Cureus*. 2020 Apr 26;12(4):e7838. PMID: 32467813. doi: 10.7759/cureus.7838.
18. Mackey T, Li J, Purushothaman V, Nali M, Shah N, Bardier C, et al. Big Data, Natural Language Processing, and Deep Learning to Detect and Characterize Illicit COVID-19 Product Sales: An Infoveillance Study on Twitter and Instagram. *JMIR Public Health Surveill*. 2020 Aug 3. PMID: 32750006. doi: 10.2196/20794.
19. Mackey T, Purushothaman V, Li J, Shah N, Nali M, Bardier C, et al. Machine Learning to Detect Self-Reporting of Symptoms, Testing Access, and Recovery Associated With COVID-19 on Twitter: Retrospective Big Data Infoveillance Study. *JMIR Public Health Surveill*. 2020 Jun 8;6(2):e19509. PMID: 32490846. doi: 10.2196/19509.
20. Chu Z, Gianvecchio S, Wang H, Jajodia S. Who is tweeting on Twitter: human, bot, or cyborg? Proceedings of the 26th Annual Computer Security Applications Conference; Austin, Texas, USA: Association for Computing Machinery; 2010. p. 21–30.  
<https://www.eecis.udel.edu/~hnw/paper/acsac10.pdf>
21. Tsou M-H, Zhang H, Jung C-T. Identifying data noises, user biases, and system errors in geo-tagged twitter messages (Tweets). arXiv preprint arXiv:171202433. 2017.
22. Ferrara E. # COVID-19 on Twitter: Bots, Conspiracies, and Social Media Activism. arXiv preprint arXiv:200409531. 2020.
23. Bernstein M, Monroy-Hernández A, Harry D, André P, Panovich K, Vargas G. 4chan and/b: An Analysis of Anonymity and Ephemerality in a Large Online Community. 2011.  
<https://www.aaai.org/ocs/index.php/ICWSM/ICWSM11/paper/view/2873/4398>
24. Signals Analytics. [December 11, 2020]; Available from: <https://www.signals-analytics.com>.
25. NetBase Quid. [December 11, 2020]; Available from: <https://netbasequid.com>.
26. Dong E, Du H, Gardner L. An interactive web-based dashboard to track COVID-19 in real time. *Lancet Infect Dis*. 2020 May;20(5):533-4. PMID: 32087114. doi: 10.1016/S1473-3099(20)30120-1.

27. Axisbits. COVID-19 Statistics API Documentation. Rapid API2020.  
<https://rapidapi.com/axisbits-axisbits-default/api/covid-19-statistics/details>
28. Han X, Wang J, Zhang M, Wang X. Using Social Media to Mine and Analyze Public Opinion Related to COVID-19 in China. *Int J Environ Res Public Health*. 2020 Apr 17;17(8). PMID: 32316647. doi: 10.3390/ijerph17082788.
29. Jelodar H, Wang Y, Orji R, Huang H. Deep Sentiment Classification and Topic Discovery on Novel Coronavirus or COVID-19 Online Discussions: NLP Using LSTM Recurrent Neural Network Approach. *IEEE J Biomed Health Inform*. 2020 Jun 9;Pp. PMID: 32750931. doi: 10.1109/jbhi.2020.3001216.
30. Amelia Nirenberg AP. Schools Reopening: The State of Play for K-12. *The New York Times*. 2020 August 17, 2020. <https://www.nytimes.com/2020/08/17/us/k-12-schools-reopening.html>
31. Abby Goodnough KS. CDC Weighs Advising Everyone to Wear a Mask. *The New York Times*. 2020 March 31, 2020. <https://www.nytimes.com/2020/03/31/health/cdc-masks-coronavirus.html>
32. Sheikh K. You're Getting Used to Masks. Will You Wear a Face Shield? *The New York Times*. 2020 May 24, 2020. <https://www.nytimes.com/2020/05/24/health/coronavirus-face-shields.html>
33. Matzner P. Using Advanced Analytics for the Early Detection of Pandemics and Outbreaks. *Early Release; Signals Analytics*. April 13, 2020. <https://www.signals-analytics.com/resources/white-papers/early-detection-pandemics-outbreaks>
34. The Hill AllSides Media Bias Rating. [October 15, 2020]; Available from: <https://www.allsides.com/news-source/hill-media-bias>.
35. Ribeiro FN, Henrique L, Benevenuto F, Chakraborty A, Kulshrestha J, Babaei M, et al., editors. Media bias monitor: Quantifying biases of social media news outlets at large-scale. *Twelfth International AAAI Conference on Web and Social Media*; 2018.  
<https://www.aaai.org/ocs/index.php/ICWSM/ICWSM18/paper/view/17878/17020>

36. Wan WD, Jacqueline. U.S. hits highest daily number of coronavirus cases since pandemic began. The Washington Post. 2020 October 23, 2020.  
<https://www.washingtonpost.com/health/2020/10/23/covid-us-spike-cases/>
37. Katz JS-K, Margot; Quealy, Kevin. A Detailed Map of Who Is Wearing Masks in the U.S. The New York Times. 2020 July 17, 2020.  
<https://www.nytimes.com/interactive/2020/07/17/upshot/coronavirus-face-mask-map.html>
38. Brennan M. Americans' Face Mask Usage Varies Greatly by Demographics. Gallup News 2020.  
<https://news.gallup.com/poll/315590/americans-face-mask-usage-varies-greatly-demographics.aspx>
39. Baker PH, Maggie. Trump Tests Positive for the Coronavirus. The New York Times. 2020 October 2, 2020. <https://www.nytimes.com/2020/10/02/us/politics/trump-covid.html>
40. Molla R. How coronavirus took over social media. Vox. 2020 March 12, 2020.  
<https://www.vox.com/recode/2020/3/12/21175570/coronavirus-covid-19-social-media-twitter-facebook-google>
41. Miller SW, Jane. Fauci Says U.S. Won't Get Back to Normal Until Late 2021. NBC News. 2020 September 11, 2020. <https://www.nbcnews.com/health/health-news/fauci-says-us-won-t-get-back-normal-until-late-n1239882>
42. Ghader S, Zhao J, Lee M, Zhou W, Zhao G, Zhang L. Observed mobility behavior data reveal social distancing inertia. arXiv preprint arXiv:200414748. 2020.
43. Traffic Monitoring Count Data: Volume and Classification Information. 2020 [updated September 28, 2020 October 7, 2020]; Available from: [https://portal.ct.gov/DOT/PP\\_SysInfo/Traffic-Monitoring](https://portal.ct.gov/DOT/PP_SysInfo/Traffic-Monitoring).
44. Schuman R. INRIX U.S. National Traffic Volume Synopsis Issue #15 (June 20-June 26, 2020). 2020 [updated June 29, 2020 October 7, 2020]; Available from: <https://inrix.com/blog/2020/06/covid19-us-traffic-volume-synopsis-15/>.
45. Vasilev E. Inferring gender of Reddit users. 2018. [https://kola.opus.hbz-nrw.de/opus45-kola/frontdoor/deliver/index/docId/1619/file/Master\\_thesis\\_Vasilev.pdf](https://kola.opus.hbz-nrw.de/opus45-kola/frontdoor/deliver/index/docId/1619/file/Master_thesis_Vasilev.pdf)

46. Finlay SC. Age and gender in Reddit commenting and success. 2014. doi:

10.1633/JISTaP.2014.2.3.2

*Figure 1 Online Social Discussion Categories vs. US Daily New COVID-19 Cases (June 15 to November 15, 2020)*

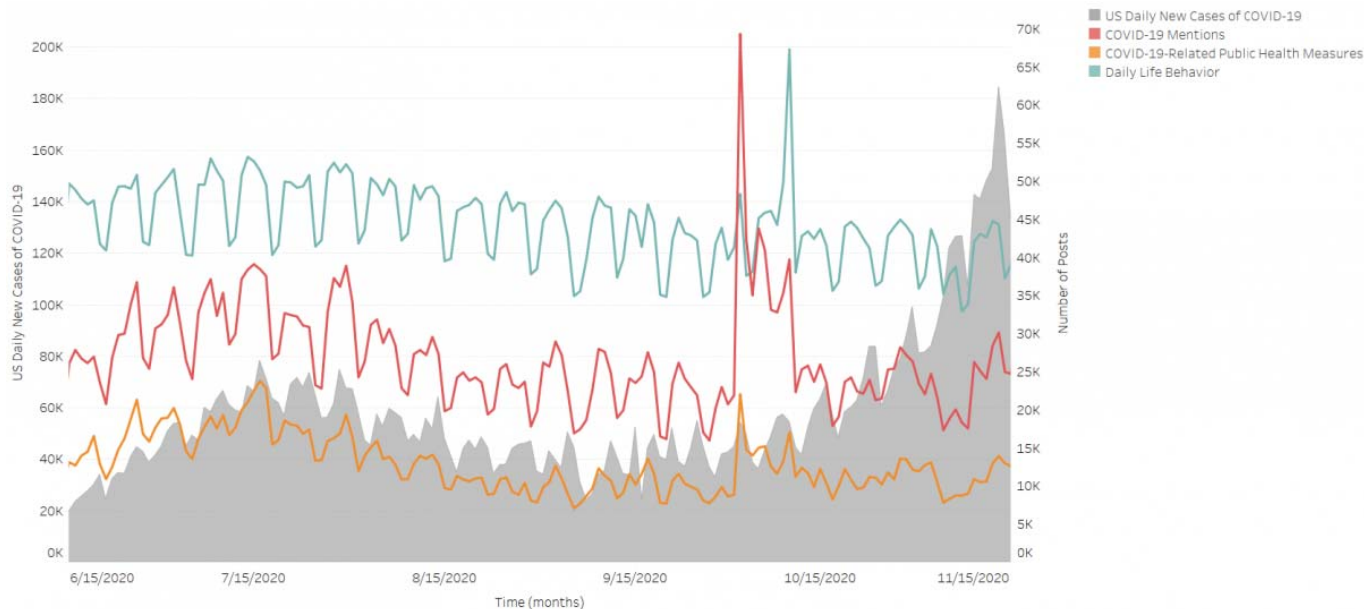

*Figure 2 Public Health Measures Online Social Discussion vs. US Daily New COVID-19 Cases (June 15 to November 15, 2020)*

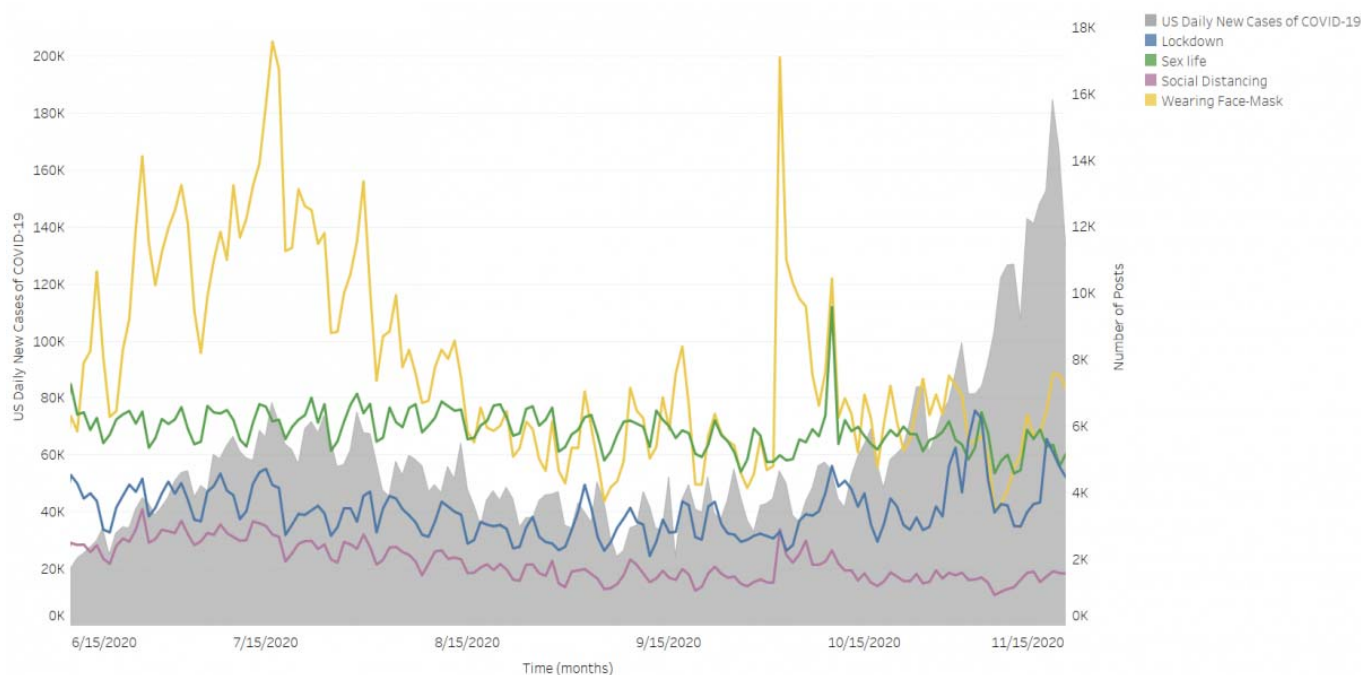

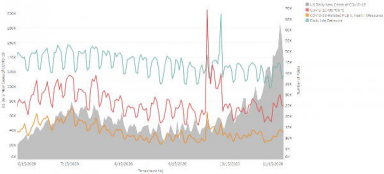

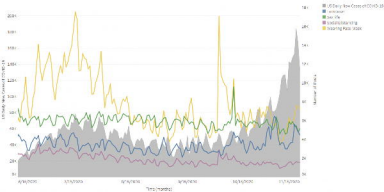

Source: http://medrxiv.org/content/10.1101/2021.02.05.21250127v1.full.pdf
